# Supplementary material
Source: PubMed Central journal article supplement (PMC4565213)
Supplement: ijcem0008-10401-f8.pdf [file ijcem0008-10401-f8.pdf]

## Gene function analysis of osteosarcoma

**Table S1.** GO and KEGG enrichment of up-regulated genes of osteosarcoma

| Category | Term                                                                                      |
|----------|-------------------------------------------------------------------------------------------|
| BP       | antigen processing and presentation of peptide or polysaccharide antigen via MHC class II |
| BP       | antigen processing and presentation                                                       |
| BP       | immune response                                                                           |
| BP       | defense response                                                                          |
| BP       | inflammatory response                                                                     |
| BP       | immune effector process                                                                   |
| BP       | response to wounding                                                                      |
| BP       | immunoglobulin mediated immune response                                                   |
| BP       | mitosis                                                                                   |
| BP       | nuclear division                                                                          |
| BP       | B cell mediated immunity                                                                  |
| BP       | cell division                                                                             |
| KEGG     | Asthma                                                                                    |
| KEGG     | Intestinal immune network for IgA production                                              |
| KEGG     | Type I diabetes mellitus                                                                  |
| KEGG     | Systemic lupus erythematosus                                                              |
| KEGG     | Allograft rejection                                                                       |
| KEGG     | Graft-versus-host disease                                                                 |
| KEGG     | Cell adhesion molecules (CAMs)                                                            |
| KEGG     | Viral myocarditis                                                                         |
| KEGG     | Autoimmune thyroid disease                                                                |
| KEGG     | Antigen processing and presentation                                                       |

## Gene function analysis of osteosarcoma

**Table S2.** GO and KEGG enrichment of down-regulated genes of osteosarcoma

| Category | Term                                         |
|----------|----------------------------------------------|
| BP       | blood vessel development                     |
| BP       | vasculature development                      |
| BP       | cell adhesion                                |
| BP       | biological adhesion                          |
| BP       | skeletal system development                  |
| BP       | cell motion                                  |
| BP       | regulation of cell proliferation             |
| BP       | blood vessel morphogenesis                   |
| BP       | cell migration                               |
| BP       | regulation of cell growth                    |
| BP       | negative regulation of cell proliferation    |
| BP       | cell motility                                |
| BP       | localization of cell                         |
| BP       | response to steroid hormone stimulus         |
| BP       | regulation of cell migration                 |
| BP       | extracellular matrix organization            |
| BP       | regulation of locomotion                     |
| BP       | regulation of cell motion                    |
| BP       | regulation of programmed cell death          |
| BP       | regulation of cell death                     |
| BP       | angiogenesis                                 |
| BP       | regulation of growth                         |
| BP       | response to wounding                         |
| BP       | negative regulation of cell migration        |
| BP       | regulation of apoptosis                      |
| BP       | response to organic substance                |
| BP       | negative regulation of locomotion            |
| BP       | negative regulation of cell motion           |
| BP       | regulation of endothelial cell proliferation |
| BP       | circulatory system process                   |
| BP       | blood circulation                            |
| BP       | response to endogenous stimulus              |
| BP       | response to hormone stimulus                 |
| BP       | extracellular structure organization         |
| BP       | positive regulation of cell proliferation    |
| BP       | regulation of cellular component size        |
| BP       | steroid metabolic process                    |
| KEGG     | Bladder cancer                               |
| KEGG     | Focal adhesion                               |
